# Supplementary material
Source: PubMed Central journal article supplement (PMC2802734)
Supplement: NIHMS28086-supplement-1.pdf [file NIHMS28086-supplement-1.pdf]

## EU-NCI Workshop on Cancer Systems Biology Speaker and Participant List

### Olaf Wolkenhauer and Robert Jaster, Co-Chairpersons

Charles Auffray  
CNRS, Villejuif

Helen Byrne  
University of Nottingham

Andrea Ciliberto  
IFOM-IEO, Milan

Dirk Drasdo  
INRIA, Le Chesnay

James E. Ferrell, Jr  
Stanford University School of Medicine, CA

Robert Gatenby  
Moffitt Cancer Center, Tampa, FL

Hanspeter Herzel  
Humboldt University, Berlin

Manfred Kunz  
University of Lübeck

Ingeborg van Leeuwen  
Karolinska Institute, Stockholm

Francis Levi  
Hospital Paul-Brousse, Villejuif

John Lowengrub  
University of California, Irvine

Frederick Marcus  
European Commission, Brussels

Katja Rateitschak  
University of Rostock

Reinhold Schäfer  
Charité, Berlin

Christine Sers  
Charité, Berlin

Brian Harms  
Merrimack Pharmaceuticals, Cambridge, MA

John Tyson  
Virginia Polytechnic Institute & State University, Blacksburg,  
VA

Michael White  
University of Liverpool

Boris Zhivotovsky  
Karolinska Institute, Stockholm

Simone Baltrusch  
University of Rostock

Nils Blüthgen  
Charité, Berlin

Marta Cascante  
Universitat of Barcelona

Trevor Dale  
Cardiff School of Biosciences

David Fell  
Brookes University, Oxford

Daniel Gallahan  
National Cancer Institute, Bethesda, MD

Ulrich Günther  
University of Birmingham

Christian Junghans  
University of Rostock

Robert Jaster  
University of Rostock

Frank Laplace  
BMBF, Berlin

Philippe Lenormand  
Centre Antoine Lacassagne, Nice

Michael Linnebacher  
University of Rostock

Philip K. Maini  
University of Oxford

Arif Malik  
Microdiscovery, Berlin

Owen Sansom  
Beatson Institute for Cancer Research, Glasgow

Karsten Schürle  
DECHEMA, Frankfurt

Santiago Schnell  
University of Michigan Medical School, Ann Arbor, MI

Darryl Shibata  
University of Southern California, Los Angeles

Julio Vera  
University of Rostock

Olaf Wolkenhauer  
University of Rostock
